# Supplementary material for: Moderately oxidized graphene–carbon nanotubes hybrid for high performance capacitive deionization
Source: Royal Society of Chemistry journal article supplement (doi:10.1039/c6ra10088k), 2016-01-01
Supplement: c6ra10088k1.pdf [file c6ra10088k1.pdf]

1 **Supporting Information**

2

3 **Moderately oxidized graphene-carbon nanotubes hybrid for**  
4 **high performance capacitive deionization**

5 *Helan Zhang<sup>†</sup>, Peng Liang<sup>†\*</sup>, Yanhong Bian<sup>†</sup>, Yong Jiang<sup>†</sup>, Xueliang Sun<sup>†</sup>, Changyong Zhang<sup>†</sup>, Xia*

6 *Huang<sup>†</sup>, Fei Wei<sup>††</sup>*

7 <sup>†</sup> State Key Joint Laboratory of Environment Simulation and Pollution Control

8 School of Environment, Tsinghua University, Beijing, 100084, P.R. China

9 <sup>††</sup> Beijing Key Laboratory of Green Chemical Reaction Engineering and Technology, Department of Chemical

10 Engineering, Tsinghua University, Beijing 100084, China

11 \*Corresponding author, Tel: +86 10 62796790; E-mail: liangpeng@tsinghua.edu.cn

12

13

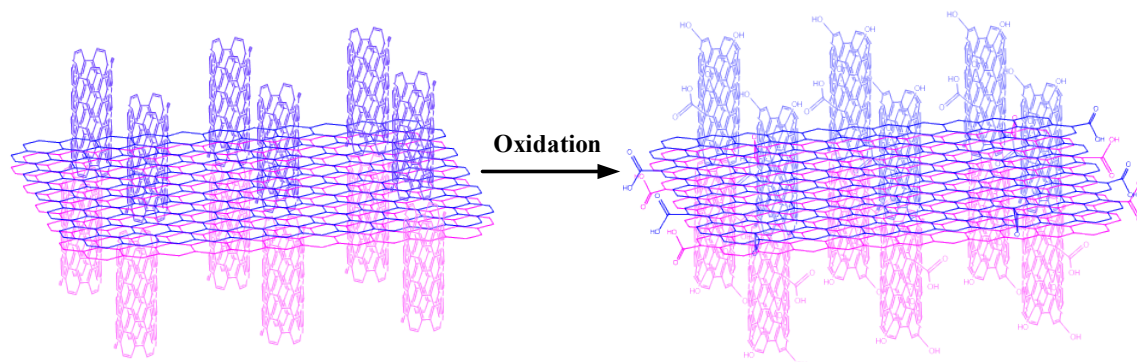

14

15

**Fig. S1** Schematic illustration of the moderate oxidation treatment for G-CNTs.

16

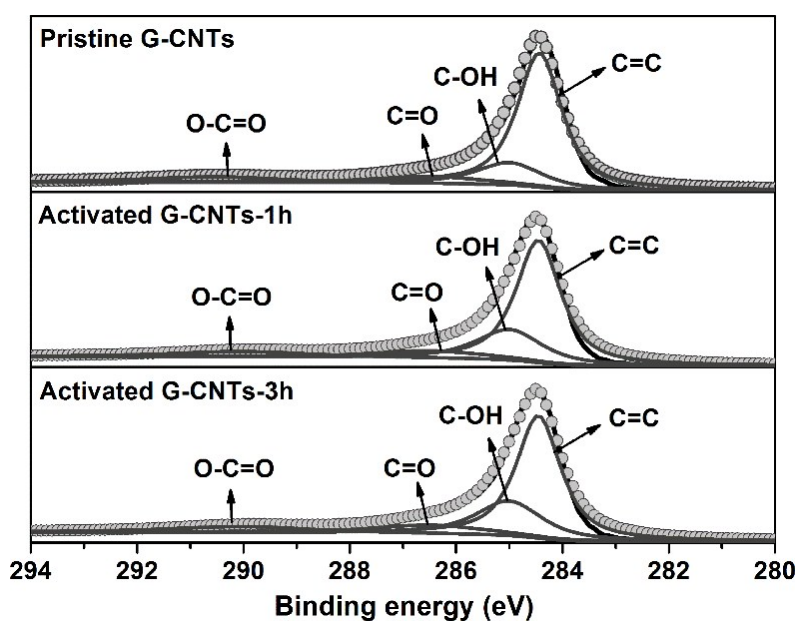

17

**Fig. S2** High-resolution C1s XPS spectra of the pristine G-CNTs, the activated G-CNTs-1h and G-CNTs-3h.

19

**Table S1.** The carbon and oxygen contents (at. %) in the pristine G-CNTs, activated G-CNTs-1h and G-CNTs-3h.

| Sample              | C (at. %) | O (at. %) |
|---------------------|-----------|-----------|
| Pristine G-CNTs     | 98.2      | 1.8       |
| Activated G-CNTs-1h | 95.7      | 4.3       |
| Activated G-CNTs-3h | 95.3      | 4.7       |

21

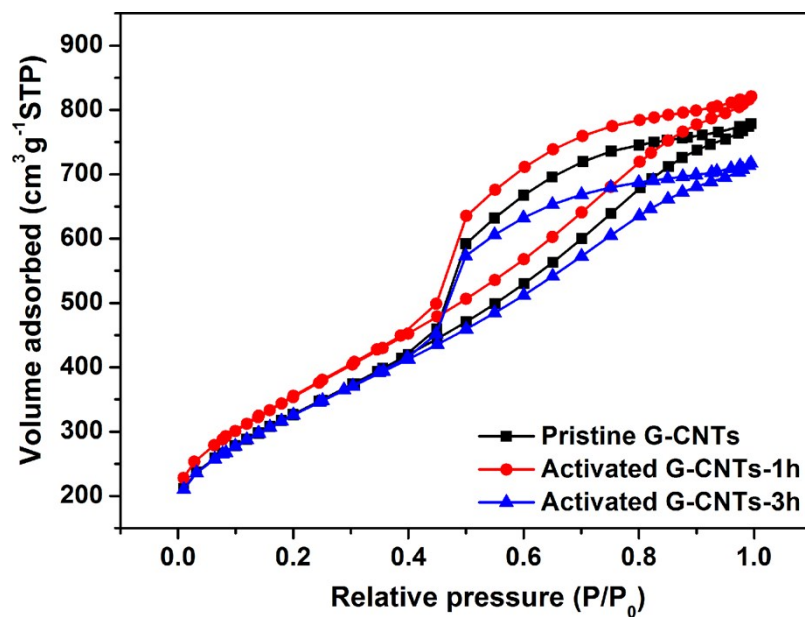

23

24 **Fig. S3** Nitrogen nitrogen adsorption–desorption isotherms of the pristine G-CNTs, the activated G-CNTs-1h and G-  
 25 CNTs-3h.

26

27 **Table S2.** BET surface area and pore volume of the pristine G-CNTs, the activated G-CNTs-1h and G-CNTs-3h.

| Sample              | BET surface area    | Pore volume          |
|---------------------|---------------------|----------------------|
|                     | (m <sup>2</sup> /g) | (cm <sup>3</sup> /g) |
| Pristine G-CNTs     | 1160                | 1.31                 |
| Activated G-CNTs-1h | 1254                | 1.42                 |
| Activated G-CNTs-3h | 1149                | 1.24                 |

28

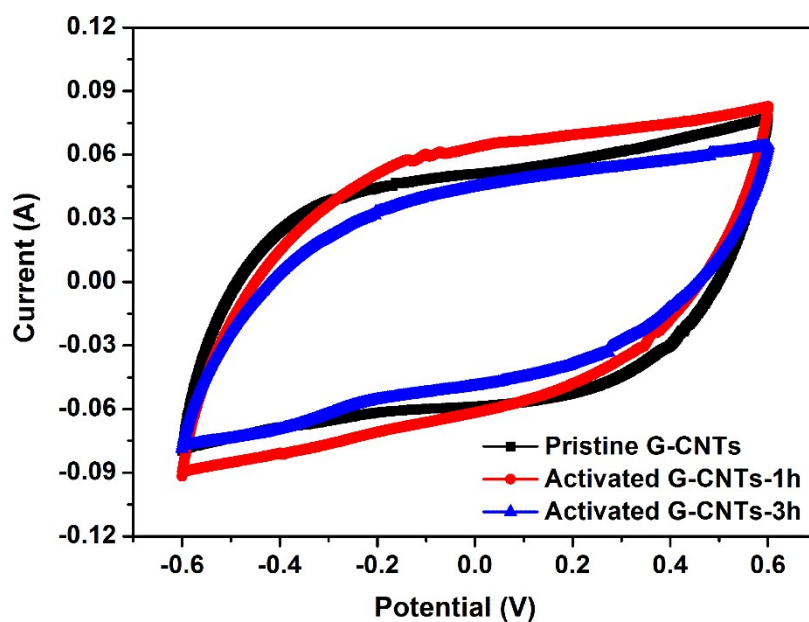

29  
 30 **Fig. S4** CV curves of the pristine G-CNTs, the activated G-CNTs-1h and G-CNTs-3h electrodes in 1M NaCl solution  
 31 at a scan rate of 10 mV/s, respectively.

32

33 **Table S3.** Specific capacitances (F/g) of the pristine G-CNTs, the activated G-CNTs-1h and G-CNTs-3h electrodes in  
 34 1M NaCl solution at a scan rate of 10 mV/s, respectively.

| Sample              | Specific capacitances (F/g) |
|---------------------|-----------------------------|
| Pristine G-CNTs     | 43.7                        |
| Activated G-CNTs-1h | 46.5                        |
| Activated G-CNTs-3h | 38.1                        |

35

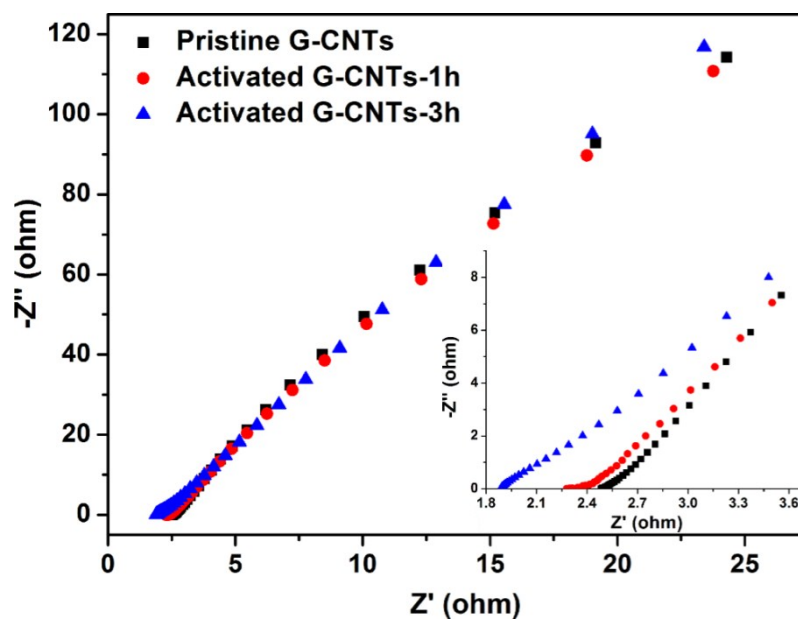

36

37 **Fig. S5** Nyquist plots of the pristine G-CNTs, the activated G-CNTs-1h and G-CNTs-3h electrodes in 1 M NaCl  
 38 aqueous solution. Inset shows the expanded high-frequency region of the plots.

39

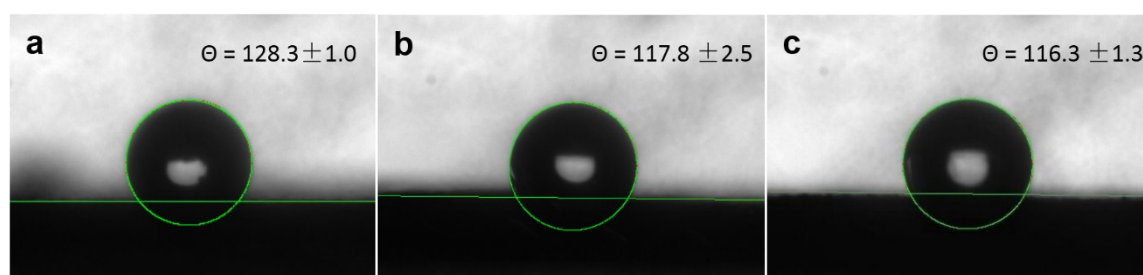

40

41 **Fig. S6** The changes in captive bubble contact angle of the pristine G-CNTs electrode (a), the activated G-CNTs-1h  
 42 electrode (b), and the activated G-CNTs-3h electrode (c).

43

44 **Table S4.** Comparison of the electrosorption capacity improvement ration of various pretreatments or modifications.

| Electrode material     | Pretreatment or modification | Improvement ration (times) |
|------------------------|------------------------------|----------------------------|
| Graphene <sup>39</sup> | N-doping                     | 1.40                       |
| Graphene <sup>50</sup> | KOH-activated treatment      | 1.34                       |
| Graphene <sup>51</sup> | Ion-selective modification   | 1.45                       |
| Graphene <sup>52</sup> | Sulphonation modification    | 2.10                       |
| G-CNTs (this work)     | Oxidation treatment          | 2.14                       |

45

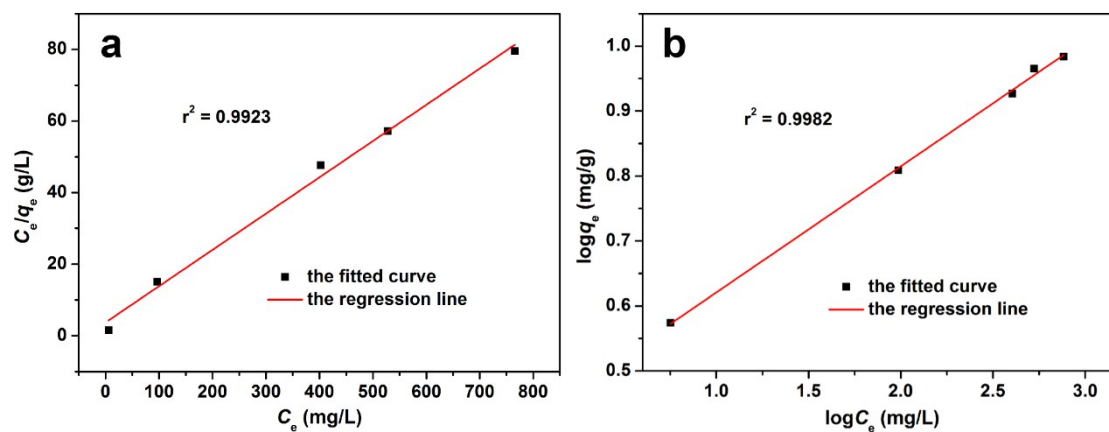

46

47 **Fig. S7** Fitting regression line by (a) Langmuir and (b) Freundlich equation for the electrosorption of the activated G-  
48 CNTs-1h electrode.

49

50 **Table S5.** Parameters determined by fitting of Langmuir and Freundlich isotherms for the CDI performance of the  
51 activated G-CNTs-1h electrode.

| Isotherm   | Parameters | Value  |
|------------|------------|--------|
| Langmuir   | $q_m$      | 9.871  |
|            | $K_L$      | 0.0271 |
|            | $r^2$      | 0.9923 |
| Freundlich | $K_F$      | 2.671  |
|            | $n$        | 5.153  |
|            | $r^2$      | 0.9982 |

52
